# Supplementary material
Source: PubMed Central journal article supplement (PMC2851972)
Supplement: 0913912107_pnas.200913912SI.pdf [file 0913912107_pnas.200913912SI.pdf]

# Supporting Information

Khan et al. 10.1073/pnas.0913912107

**Table S1. Immunohistochemistry staining criteria used to evaluate the total staining scores for the malignant lymphocytes in each CTCL biopsy**

|                        |                                                                                     |
|------------------------|-------------------------------------------------------------------------------------|
| Intensity              |                                                                                     |
| Epidermis and dermis   | 0: negative<br>1: weakly positive<br>2: moderately positive<br>3: strongly positive |
| Frequency              |                                                                                     |
| Dermis                 | 1: <5% positive<br>2: 25–50% positive<br>3: 50–75% positive<br>4: >75% positive     |
| Epidermis infiltrate   | 0: none<br>1: few/sparse<br>2: many single<br>3: Pautrier's                         |
| Dermis infiltrate type | 0: normal<br>1: patch<br>2: plaque<br>3: tumor                                      |
| Total staining scores  | 1–13                                                                                |
| Strong                 | ≥6                                                                                  |
| Weak                   | <6                                                                                  |
